# Supplementary material
Source: MDPI journal article supplement (https://www.mdpi.com/2075-4701/12/2/273)
Supplement: s1 [file s1]

## Article

# Elastocaloric and Magnetocaloric Effects Linked to the Martensitic Transformation in Bulk $\text{Ni}_{55}\text{Fe}_{11}\text{Mn}_7\text{Ga}_{27}$ Alloys Produced by Arc Melting and Spark Plasma Sintering

J. D. Navarro-García <sup>1,\*</sup>, J. P. Camarillo-García <sup>2</sup>, F. Alvarado-Hernández <sup>2</sup>, J. L. Sánchez Llamazares <sup>1,\*</sup> and H. Flores-Zúñiga <sup>1</sup>

<sup>1</sup> Instituto Potosino de Investigación Científica y Tecnológica A.C., Camino a la Presa San José 2055, Col. Lomas 4 section, San Luis Potosí 78216, Mexico; horacio.flores@ipicyt.edu.mx

<sup>2</sup> Universidad Autónoma de Zacatecas, Ramón López Velarde 801, Col. Centro, Zacatecas 98000, Mexico; jp.camarillo.garcia@uaz.edu.mx (J.P.C.-G.); ingenierofah@gmail.com (F.A.-H.)

\* Correspondence: Correspondence: daniel.navarro@ipicyt.edu.mx (J.D.N.-G.); jose.sanchez@ipicyt.edu.mx (J.L.S.LL.); Tel.: +52-444-8342000 (J.L.S.LL.)

**Citation:** Navarro-García, J.D.; Camarillo-García, J.P.; Alvarado-Hernández, F.; Sánchez Llamazares, J.L.; Flores-Zúñiga, H. Elastocaloric and Magnetocaloric Effects Linked to The Martensitic Transformation in Bulk  $\text{Ni}_{55}\text{Fe}_{11}\text{Mn}_7\text{Ga}_{27}$  Alloys Produced by Arc Melting and Spark Plasma Sintering. *Metals* **2022**, *12*, 273. <https://doi.org/10.3390/met12020273>

Academic Editor: Alexander V. Shelyakov

Received: 24 December 2021

Accepted: 27 January 2022

Published: 2 February 2022

**Publisher's Note:** MDPI stays neutral with regard to jurisdictional claims in published maps and institutional affiliations.

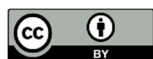

**Copyright:** © 2022 by the authors. This article is an open access article distributed under the terms and conditions of the Creative Commons Attribution (CC BY) license (<http://creativecommons.org/licenses/by/4.0/>).

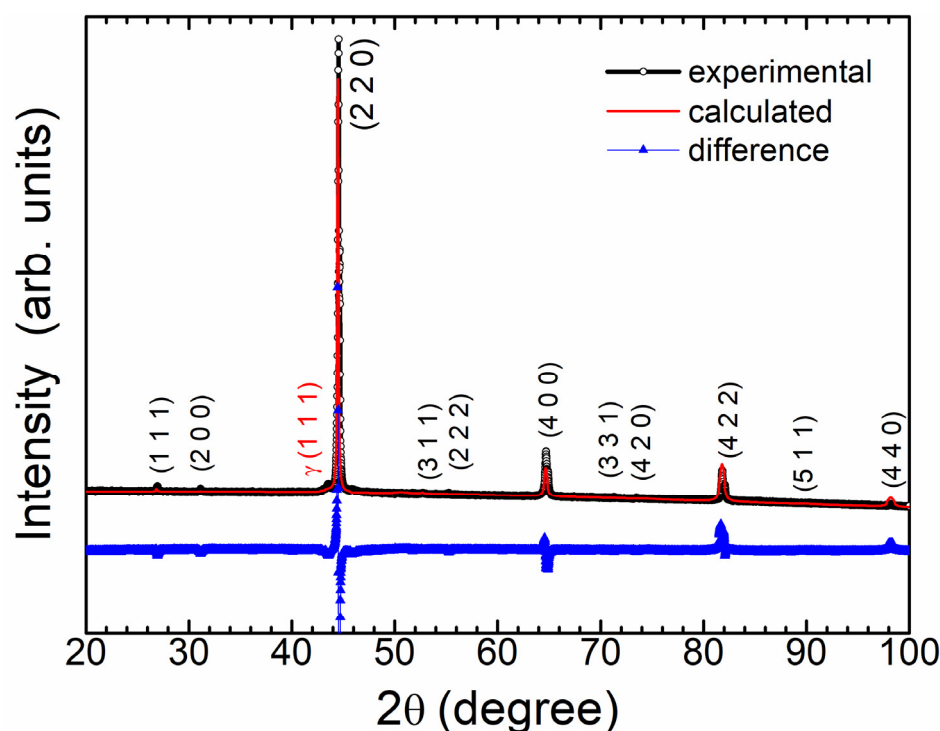

**Figure S1.** Rietveld refinement of the X-ray powder diffraction pattern of a finely pulverized sample piece taken from the bulk arc melted sample. The black open circles and red solid line represent the experimental points and Rietveld refined data, respectively, whereas the difference between experimental and simulated patterns is given by the blue line depicted at the bottom of the figure. The R-factor values obtained for the refinement were:  $R_p = 11.25\%$ ,  $R_{wp} = 28.12\%$  and  $R_{exp} = 2.38\%$ .
